# Supplementary material for: Bilberries: Curative and Miraculous – A Review on Bioactive Constituents and Clinical Research
Source: PubMed Central journal article supplement (PMC9277355; doi:10.3389/fphar.2022.909914), 2022-06-29
Supplement: Table1.pdf [file Table1.pdf]

| Study / Condition                             | Design                               | Study group                                                                     | Intervention                                                                                                                        | Outcomes                                                                                                                                                                         | Statistically significant?        | Comments                |
|-----------------------------------------------|--------------------------------------|---------------------------------------------------------------------------------|-------------------------------------------------------------------------------------------------------------------------------------|----------------------------------------------------------------------------------------------------------------------------------------------------------------------------------|-----------------------------------|-------------------------|
| Widén et al. 2015<br>Gingivitis               | Randomized, placebo controlled trial | n = 24<br>Patients with gingivitis                                              | 250 or 500 g bilberries or placebo or standard therapy                                                                              | Reduced inflammatory cytokine levels and bleeding on probing                                                                                                                     | Yes (for 500 g group)             | -                       |
| Karlsen et al. 2010<br>Cardiovascular risk    | Randomized, placebo controlled trial | n = 62<br>Subjects at elevated risk of cardiovascular disease                   | 330 ml of bilberry juice or water<br>Daily for 4 weeks                                                                              | Reduced C-reactive protein, IL-6, IL-15, and monokine induced by INF- $\gamma$<br>Increase of TNF- $\alpha$<br><br>No change in oxidative stress markers or antioxidant status   | Yes                               | -                       |
| Kolehmainen et al. 2012<br>Metabolic syndrome | Randomized controlled trial          | n = 27<br>Overweight individuals with additional symptoms of metabolic syndrome | Equivalent of 400 g fresh bilberries (200 g of bilberry purée and 40 g of dried bilberries) or no intervention<br>Daily for 8 weeks | Reductions in several inflammatory parameters (C-reactive protein, IL-6, IL-12 and LPS)<br>Significantly lower inflammation scores<br>Glucose and lipid metabolism unchanged     | Partially                         | -                       |
| Aboonabi et al. 2020<br>Metabolic syndrome    | Open-label trial                     | n = 55<br>Healthy group and metabolic syndrome group                            | 320 mg anthocyanin supplements (purified bilberry and blackcurrant anthocyanins)<br>Twice daily for 4 weeks                         | Reduced fasting serum glucose<br>Reduced serum triglycerides and LDL-C<br>Reduced high-sensitivity C-reactive protein<br>Decreased ADP-induced platelet activation configuration | Yes (in Metabolic syndrome group) | Lack of placebo control |

|                                                       |                                                    |                                                                                                                |                                                                                                                                                     |                                                                                                                                           |     |   |
|-------------------------------------------------------|----------------------------------------------------|----------------------------------------------------------------------------------------------------------------|-----------------------------------------------------------------------------------------------------------------------------------------------------|-------------------------------------------------------------------------------------------------------------------------------------------|-----|---|
| Biedermann et al. 2012<br><br>Ulcerative colitis      | Open-label pilot trial                             | n = 11<br><br>Patients with mild to moderate ulcerative colitis                                                | Preparation made of dried bilberry powder and concentrated bilberry juice, 160 g (corresponding to 600 g fresh bilberries)<br><br>Daily for 6 weeks | 63,4% patients achieving remission<br><br>Decrease in total Mayo score in all patients<br><br>Decreased fecal calprotectin levels         | Yes | - |
| Lynn et al. 2018<br><br>Exercise-induced inflammation | Single blind, randomized, placebo-controlled trial | n = 19<br><br>Recreational runners                                                                             | 400 ml bilberry juice or control drink<br>Daily 5 days before, during and two days after a half marathon race                                       | Mild increase of exercise-induced muscle soreness and of C-reactive protein levels in blood in bilberry group post-race                   | Yes | - |
| Hoggard et al. 2013<br><br>T2DM                       | Double-blinded, placebo-controlled crossover trial | n = 8<br><br>Male subjects with T2DM controlled by diet and lifestyle alone or with impaired glucose tolerance | 470 mg standardized bilberry fruit extract (Mirtoselect) or placebo<br><br>Single oral dose followed by a polysaccharide drink                      | Lower postprandial insulin and glucose blood levels compared to placebo<br><br>No change in gut, pancreatic or anti-inflammatory peptides | Yes | - |

|                                                          |                                                                                              |                                                                                                                  |                                                                                                                                     |                                                                                                                                                   |      |                                                                              |
|----------------------------------------------------------|----------------------------------------------------------------------------------------------|------------------------------------------------------------------------------------------------------------------|-------------------------------------------------------------------------------------------------------------------------------------|---------------------------------------------------------------------------------------------------------------------------------------------------|------|------------------------------------------------------------------------------|
| De Mello et al.<br>2011<br><br>T2DM                      | Randomized,<br>controlled trial                                                              | n = 104<br><br>Individuals with<br>impaired glucose<br>metabolism<br>and/or symptoms<br>of metabolic<br>syndrome | 400g fresh bilberries as<br>a part of diet high in<br>fatty fish, bilberries<br>and wholegrain<br>products<br><br>Daily for 8 weeks | Lower fasting plasma glucose level<br><br>Insulin sensitivity remained unchanged                                                                  | Yes  | Bilberries<br>were a part of<br>a more<br>complex<br>dietary<br>intervention |
| Chan et al.<br>2021<br><br>T2DM                          | Randomized,<br>double-blind,<br>placebo-<br>controlled, cross-<br>over intervention<br>study | n = 20<br><br>Patients with<br>T2DM controlled<br>by oral<br>medication                                          | 1400 mg of bilberry<br>extract (25%<br>anthocyanidins)<br>Once per day for 4<br>weeks                                               | Reduced glycated hemoglobin<br><br>No change in other parameters                                                                                  | No   | -                                                                            |
| Canter and<br>Ernst 2004<br>Night vision                 | Systematic<br>review                                                                         | All clinical<br>studies before<br>2004                                                                           | -                                                                                                                                   | 4 out of 5 randomized controlled trials<br>found no significant effect<br>Other studies report improvements in<br>some of the measured parameters | -    | Trials<br>without<br>placebo<br>control were                                 |
| Scharrer and<br>Ober 1981<br><br>Diabetic<br>retinopathy | Open-label,<br>placebo-<br>controlled trial                                                  | n = 31<br><br>Patients with<br>diabetic<br>retinopathy                                                           | 600 mg of unspecified<br>bilberry fruit extract +<br>30 mg beta-carotene or<br>placebo<br><br>Daily for 4 weeks                     | Reduced vascular permeability<br><br>Remission of changes of retinal vessels                                                                      | n.a. | -                                                                            |

|                                                                  |                                                    |                                                        |                                                                                                                                                                                                                                                                                                                       |                                                                                                                                                                                                                                         |      |                                                 |
|------------------------------------------------------------------|----------------------------------------------------|--------------------------------------------------------|-----------------------------------------------------------------------------------------------------------------------------------------------------------------------------------------------------------------------------------------------------------------------------------------------------------------------|-----------------------------------------------------------------------------------------------------------------------------------------------------------------------------------------------------------------------------------------|------|-------------------------------------------------|
| Perossini et al. 1987<br>Retinopathy (diabetic and hypertensive) | Randomized, double blind, placebo-controlled trial | n = 36<br>Patients with retinopathy                    | 320 mg of a bilberry extract containing 25% anthocyanidins or placebo<br><br>Daily for 4 weeks                                                                                                                                                                                                                        | 77 - 90% improvement (compared to placebo) in ophthalmoscopic and fluoro-angiographic anomalies                                                                                                                                         | n.a. | No clear information about statistical analysis |
| Kim et al. 2008<br>Diabetic retinopathy                          | Prospective multicenter clinical trial             | n = 88<br>Patients with diabetic retinopathy           | Unspecified bilberry fruit extract 510 mg<br>Daily over one year                                                                                                                                                                                                                                                      | Gradual improvement in contrast sensitivity<br>Other parameters unchanged                                                                                                                                                               | Yes  | Publication in Korean language                  |
| Steigerwalt et al. 2010<br>Elevated intraocular pressure         | Open-label pilot trial                             | n = 79<br>Patients with elevated intra-ocular pressure | Dietary supplementation with Mirtogenol®: a combination of two phenolic extracts: 80 mg from bilberry (Mirtoselect®) (standardized to 36% anthocyanins) and 40 mg French maritime pine bark (Pycnogenol®) (standardized to 70% procyanidins), or Latanoprost eye drops, or combination<br><br>Once daily for 24 weeks | Intra-ocular pressure decrease took 4 weeks in latanoprost group and 24 weeks in Mirtogenol group, after which they reached the same levels<br><br>Comparable effects for gradually increasing central artery blood flow between groups | Yes  | -                                               |

|                                                        |                                                               |                                            |                                                                                 |                                                                                                           |     |                                          |
|--------------------------------------------------------|---------------------------------------------------------------|--------------------------------------------|---------------------------------------------------------------------------------|-----------------------------------------------------------------------------------------------------------|-----|------------------------------------------|
| Anderson et al. 2011                                   | Placebo-controlled trial                                      | n = 22                                     | 160 mg of (unspecified) bilberry nutraceutical or placebo                       | Ocular Surface Disease Index was improved compared to placebo                                             | Yes | Poster presentation with incomplete data |
| Dry eye symptoms                                       |                                                               | Self-reported dry eye symptoms             | Daily for 30 days                                                               | Tears break-up time and Schirmer's test not significant                                                   |     |                                          |
| Kosehira et al. 2020                                   | Double-blind, randomized, placebo-controlled trial            | n = 109                                    | 240 mg standardized bilberry extract (35% anthocyanins) or placebo              | Improvement in the tonic accommodation of the ciliary muscle during near-vision tasks on display terminal | Yes | -                                        |
| Ocular fatigue                                         |                                                               |                                            | Daily for 12 weeks                                                              |                                                                                                           |     |                                          |
| Kamiya et al. 2013                                     | Prospective, randomized, placebo-controlled, cross-over trial | n = 30                                     | 400 mg of yeast-fermented bilberry fruit extract or placebo                     | Improvement in accommodation and mesopic contrast sensitivity                                             | Yes | -                                        |
| Myopia                                                 |                                                               | With myopia, otherwise healthy             | Daily for 4 weeks                                                               | Other measured parameters unchanged                                                                       |     |                                          |
| Arevström et al. 2019                                  | Open-label randomized controlled trial                        | n = 50                                     | Freeze-dried bilberry powder (40 g per day) taken with meals or no intervention | hs-CRP unchanged between groups                                                                           | Yes | -                                        |
| Dyslipidemia and inflammation after myocardial infarct |                                                               | Patients directly after myocardial infarct | Daily for 8 weeks                                                               | Oxidized LDL improved in bilberry group<br><br>Improvement in a 6-minute walking test in bilberry group   |     |                                          |

|                                                        |                                                    |                                                      |                                                                                                          |                                                                                                                                                    |     |                       |
|--------------------------------------------------------|----------------------------------------------------|------------------------------------------------------|----------------------------------------------------------------------------------------------------------|----------------------------------------------------------------------------------------------------------------------------------------------------|-----|-----------------------|
| Bryl-Górecka et al. 2020                               | Open-label randomized controlled trial             | n = 50<br>Patients directly after myocardial infarct | Freeze-dried bilberry powder (40 g per day) taken with meals or no intervention<br><br>Daily for 8 weeks | Improvement in the blood profile<br><br>Reduced endothelial vesiculation                                                                           | Yes | -                     |
| Dyslipidemia and inflammation after myocardial infarct |                                                    |                                                      |                                                                                                          |                                                                                                                                                    |     |                       |
| Qin et al., 2009                                       | Double-blind, randomized, placebo-controlled trial | n = 120<br><br>Patients with dyslipidemia            | 320 mg anthocyanin supplements (purified bilberry and blackcurrant anthocyanins)<br>Daily for 12 weeks   | Decreased LDL and increased HDL plasma concentrations<br><br>Increased cellular cholesterol efflux to serum<br>No change in fasting glucose levels | Yes | -                     |
| Dyslipidemia                                           |                                                    |                                                      |                                                                                                          |                                                                                                                                                    |     |                       |
| Zhu et al., 2013                                       | Randomized, placebo-controlled trial               | n = 150<br><br>Patients with hypercholesterolemia    | 320 mg anthocyanin supplements (purified bilberry and blackcurrant anthocyanins)<br>Daily for 24 weeks   | Decreased CRP and IL-1b in plasma<br><br>Decreased LDL and increased HDL plasma levels<br>Fasting glucose levels unchanged                         | Yes | -                     |
| Dyslipidemia                                           |                                                    |                                                      |                                                                                                          |                                                                                                                                                    |     |                       |
| Habanova et al. 2016                                   | Pre-post intervention study                        | n = 65<br>Generally healthy subjects                 | 150 g of frozen bilberries<br>3 times a week for 6 weeks                                                 | Decrease in total cholesterol, LDL and triglycerides, and a favorable increase in HDL                                                              | Yes | Lack of control group |
| Dyslipidemia                                           |                                                    |                                                      |                                                                                                          |                                                                                                                                                    |     |                       |

|                       |                          |                                                  |                                                                                                                 |                                                                       |     |                       |
|-----------------------|--------------------------|--------------------------------------------------|-----------------------------------------------------------------------------------------------------------------|-----------------------------------------------------------------------|-----|-----------------------|
| Thomasset et al. 2009 | Open-label pilot trial   | n = 25                                           | Standardized anthocyanin-rich bilberry fruit extract Mirtocyan (1400, 2800 or 5600 mg)                          | Tumor cell proliferation decreased by 7%                              | Yes | Lack of control group |
| Colorectal cancer     |                          | Colorectal cancer patients scheduled for surgery | Daily for 7 days before surgery                                                                                 | Apoptotic index increased from 3.6% to 5.3%, regardless of the dosage |     |                       |
| Tadić et al. 2021     | Placebo-controlled trial | n = 25                                           | Cream which incorporated both the oil from bilberry seeds and the extract from bilberry leaves or placebo cream | Increase of the hydration of stratum corneum                          | Yes | -                     |
| Skin hydration        |                          |                                                  | Daily for 30 days                                                                                               | Improved skin barrier function                                        |     |                       |
